# Supplementary material
Source: Research Square preprint supplement (doi:10.21203/rs.3.rs-8750837/v1)
Supplement: Supplementary file 1 [file 72ec98e4eecc8f9efb6e6876.pdf]

## Supplementary Material

**Table S1.** Age-specific Stage Distribution of Gastric Cancer Detected Without Screening

| Age group | Stage I | Stage II | Stage III | Stage IV |
|-----------|---------|----------|-----------|----------|
| 10 - 19   | 0.224   | 0.074    | 0.137     | 0.634    |
| 20 - 29   | 0.342   | 0.068    | 0.124     | 0.466    |
| 30 - 39   | 0.500   | 0.094    | 0.104     | 0.302    |
| 40 - 49   | 0.577   | 0.098    | 0.092     | 0.233    |
| 50 - 59   | 0.631   | 0.084    | 0.094     | 0.191    |
| 60 - 69   | 0.637   | 0.077    | 0.098     | 0.188    |
| 70 - 79   | 0.659   | 0.077    | 0.090     | 0.174    |
| 80 - 89   | 0.613   | 0.093    | 0.096     | 0.198    |

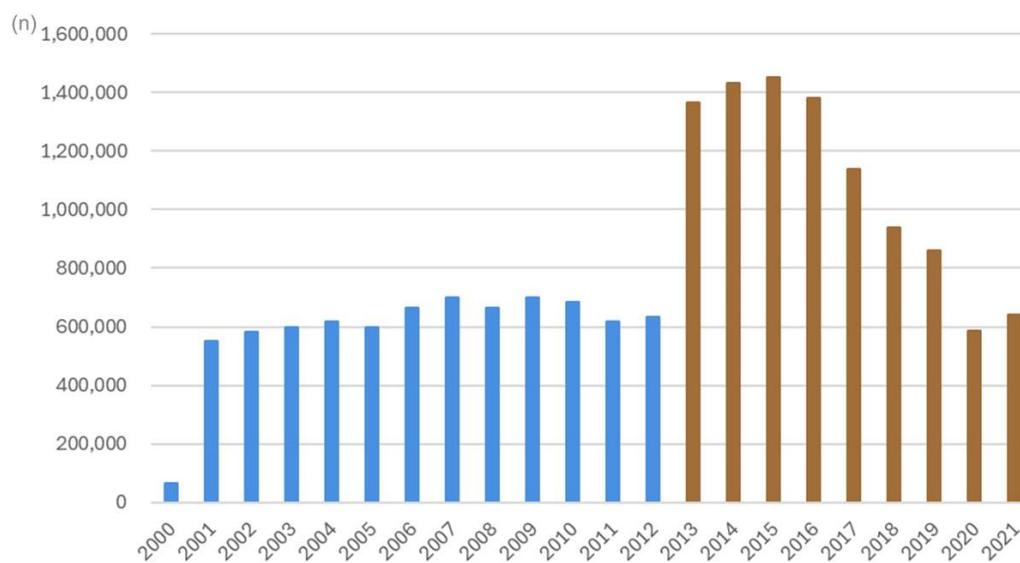

**Figure S1. Annual number of *H. pylori* eradications in Japan, 2000–2021.**

Eradication for peptic ulcer disease was widely implemented from 2000, followed by a rapid expansion of eradication uptake after national insurance coverage for chronic gastritis was introduced in 2013.
